# Supplementary figures and images for: The others: our biased perspective of eukaryotic genomes
Source: PubMed Central journal article supplement — Trends Ecol Evol. Author manuscript; Available in PMC 2015 Feb 27. (PMC4342545; doi:10.1016/j.tree.2014.03.006), 2014-04-11

**Cultures**

**Genomes**

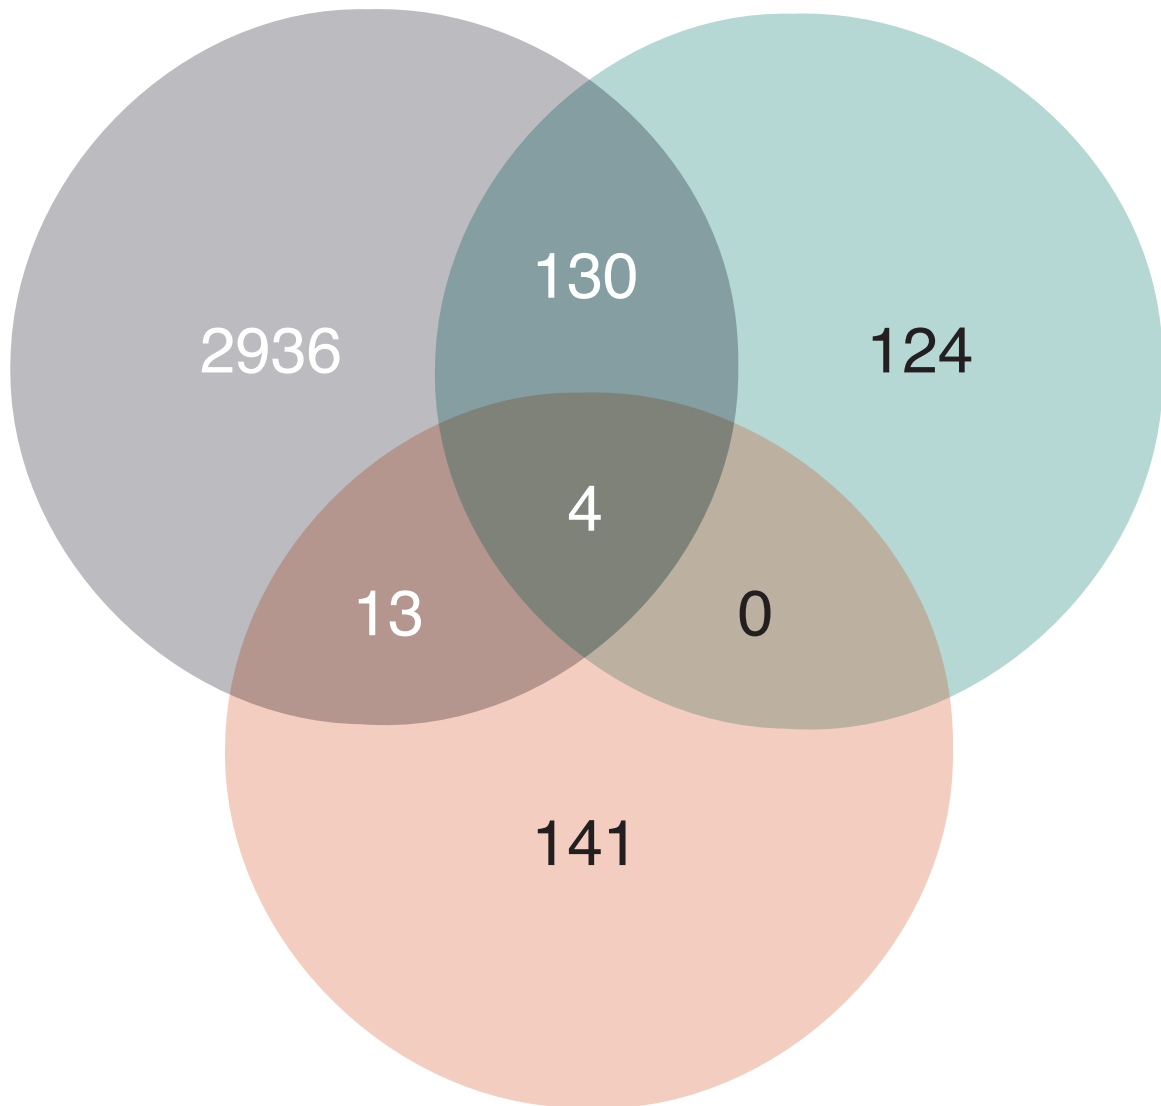

**SAGs**

Supplement: NIHMS62053-supplement-Supplementary_Material_3.pdf [file NIHMS62053-supplement-Supplementary_Material_3.pdf]
